# Supplementary material for: Antiviral Mechanism of Virucidal Sialic Acid Modified Cyclodextrin
Source: MDPI journal article supplement (doi:10.3390/pharmaceutics15020582), 2023-02-09
Supplement: s1 [file s1]

Archive with 1 entries (1 files):
- CD-6SLN mechanism SI_clean.pdf
